# Supplementary material for: WorldCereal: a dynamic open-source system for global-scale, seasonal, and reproducible crop and irrigation mapping
Source: Copernicus journal article supplement (doi:10.5194/essd-2023-184), 2023-05-24
Supplement: Supplementary file 1 [file essd-2023-184-supplement.pdf]

**Supplement to: “WorldCereal: a dynamic open-source system for global-scale, seasonal, and reproducible crop and irrigation mapping”**

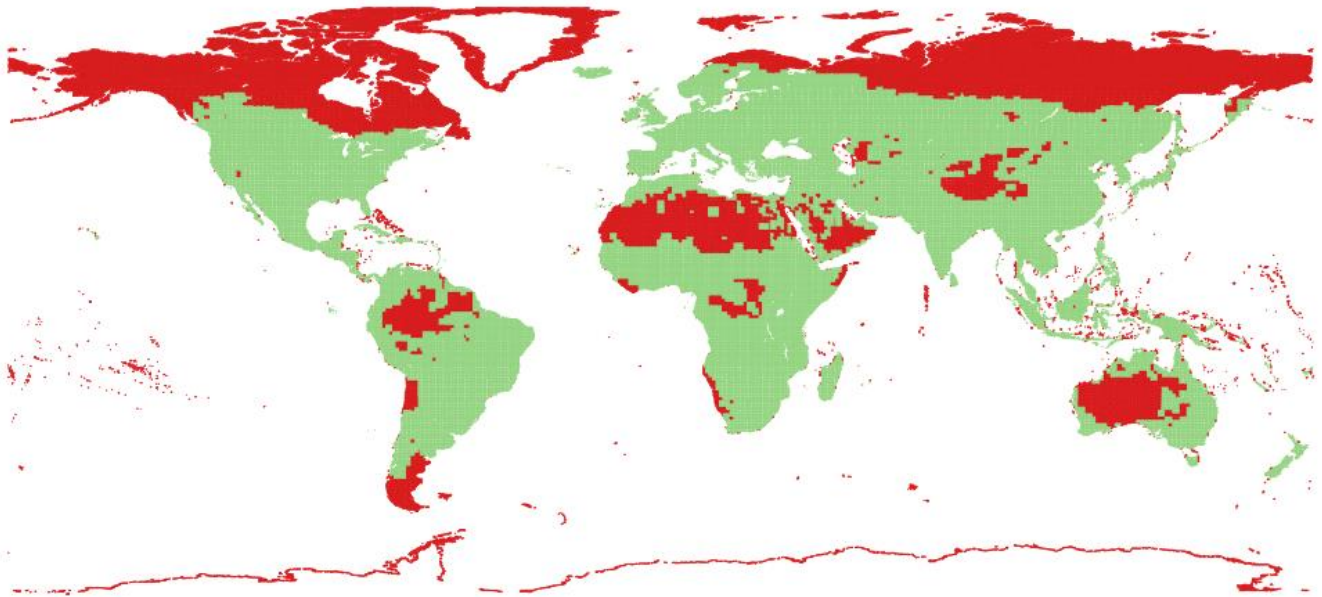

5

**Figure S1: Sentinel-2 tiles included in the 2021 global WorldCereal processing run (shown in green), vs. the tiles excluded from the global processing run (shown in red).**

**Table S1: Definition of vegetation indices used for training WorldCereal models. In the formula column, Bxx refers to Sentinel-2 reflectance bands.**

10

| Abbreviation | Full name                                  | Formula                                                   |
|--------------|--------------------------------------------|-----------------------------------------------------------|
| NDVI         | Normalized Difference Vegetation Index     | $(B08 - B04) / (B08 + B04)$                               |
| EVI          | Enhanced Vegetation Index                  | $2.5 * (B08 - B04) / (B08 + 6.0 * B04 - 7.5 * B02 + 1.0)$ |
| NDWI         | Normalized Difference Water Index          | $(B08 - B03) / (B08 + B03)$                               |
| mNDWI        | Modified Normalized Difference Water Index | $(B08 - B12) / (B08 + B12)$                               |
| NDMI         | Normalized Difference Moisture Index       | $(B08 - B11) / (B08 + B11)$                               |
| GVMi         | Global Vegetation Moisture Index           | $((B08 + 0.1) - (B12 + 0.02)) / ((B08 +$                  |

---

|        |                                       |                             |
|--------|---------------------------------------|-----------------------------|
|        |                                       | $0.1) + ((B12 + 0.02))$     |
| NDGI   | Normalized Difference Greenness Index | $(B03 - B04) / (B03 + B04)$ |
| ANIR   | Angle on Near Infrared                | See Khanna et al. (2007)*   |
| NDRE85 | Normalized Difference Red Edge Index  | $(B08 - B05) / (B08 + B05)$ |
| NDRE75 | Normalized Difference Red Edge Index  | $(B07 - B05) / (B07 + B05)$ |
| RVI    | Radar Vegetation Index                | $(4 * VH) / (VV + VH) **$   |

---

\* Khanna S., Palacios-Orueta A., Whiting M.L., Ustin S.L., Riaño D., Litago J. (2007). Development of angle indexes for soil moisture estimation, dry matter detection and land-cover discrimination. *Remote Sensing of Environment*, 109 (2), 154-165. <https://doi.org/10.1016/j.rse.2006.12.018>.

15 \*\* VH and VV backscatter expressed in linear power units.
